# 1 Towards Novel Herbicide Modes of Action by Inhibiting 2 Lysine Biosynthesis in Plants

3

4 Tatiana P. Soares da Costa<sup>1#\*</sup>, Cody J. Hall<sup>1#</sup>, Santosh Panjekar<sup>2,3</sup>, Jessica A. Wyllie<sup>1</sup>, Rebecca  
5 M. Christoff<sup>4</sup>, Saadi Bayat<sup>4</sup>, Mark D. Hulett<sup>1</sup>, Belinda M. Abbott<sup>4</sup>, Anthony R. Gendall<sup>5,6</sup>,  
6 Matthew A. Perugini<sup>1\*</sup>

7

8 <sup>1</sup> Department of Biochemistry and Genetics, La Trobe Institute for Molecular Science, La  
9 Trobe University, Bundoora, VIC 3086, Australia.

10 <sup>2</sup> Australian Synchrotron, ANSTO, 800 Blackburn Road, Clayton, VIC 3168, Australia.

11 <sup>3</sup> Department of Molecular Biology and Biochemistry, Monash University, Melbourne, VIC  
12 3800, Australia.

13 <sup>4</sup> Department of Chemistry and Physics, La Trobe Institute for Molecular Science, La Trobe  
14 University, Bundoora, VIC 3086, Australia.

15 <sup>5</sup> Department of Animal, Plant and Soil Sciences, AgriBio, La Trobe University, Bundoora,  
16 VIC 3086, Australia.

17 <sup>6</sup> Australian Research Council Research Hub for Medicinal Agriculture.

18

19 # T.P.S.C. and C.J.H. are joint first authors

20

21 \* Correspondence:

22 T. P. Soares da Costa, Department of Biochemistry and Genetics, La Trobe University,  
23 Bundoora, VIC 3086, Australia

24 Tel. (+61) 3 9479 2227

25 E-mail: [T.SoaesdaCosta@latrobe.edu.au](mailto:T.SoaesdaCosta@latrobe.edu.au)

26 M. A. Perugini, Department of Biochemistry and Genetics, La Trobe University, Bundoora,  
27 VIC 3086, Australia

28 Tel. (+61) 3 9479 6570

29 E-mail: [M.Perugini@latrobe.edu.au](mailto:M.Perugini@latrobe.edu.au)

30 **Abstract**

31 Weeds are becoming increasingly resistant to our current herbicides, posing a significant threat  
32 to agricultural production. Therefore, new herbicides are urgently needed. In this study, we  
33 exploited a novel herbicide target, dihydrodipicolinate synthase (DHDPS), which catalyses the  
34 first and rate-limiting step in lysine biosynthesis. Using a high throughput chemical screen, we  
35 identified the first class of plant DHDPS inhibitors that have micromolar potency against  
36 *Arabidopsis thaliana* DHDPS isoforms. Employing X-ray crystallography, we determined that  
37 this class of inhibitors binds to a novel and unexplored pocket within DHDPS, which is highly  
38 conserved across plant species. We also demonstrated that the inhibitors attenuated the  
39 germination and growth of *A. thaliana* seedlings and confirmed their pre-emergence herbicidal  
40 activity in soil-grown plants. These results provide proof-of-concept that lysine biosynthesis  
41 represents a promising target for the development of herbicides with a novel mode of action to  
42 tackle the global rise of herbicide resistant weeds.

## 43 Introduction

44 Our ability to provide food security for a growing world population is being increasingly  
45 challenged by the emergence and spread of herbicide resistant weeds. Resistance has now been  
46 observed to the most widely used classes of herbicides. This includes amino acid biosynthesis  
47 inhibitors such as chlorsulfuron, glufosinate and glyphosate, which target enzymes in the  
48 biosynthetic pathways leading to the production of branched-chain amino acids, glutamine and  
49 aromatic amino acids, respectively (Duke, 2012; Hall et al., 2020; Heap, 2021, 2014; Vats,  
50 2015). The impact of herbicide resistance is exacerbated by the lack of new herbicides entering  
51 the market in the past 30 years, especially those with new mechanisms of action (Duke, 2012).  
52 Nevertheless, the successful commercialisation of such herbicides provides proof-of-concept  
53 that targeting the biosynthesis of amino acids offers an excellent strategy for herbicide  
54 development (Hall et al., 2020). Amino acids are not only essential building blocks for protein  
55 biosynthesis, but they also play important roles in physiological processes that are critical for  
56 plant growth and development, such as carbon and nitrogen metabolism, in addition to serving  
57 as precursors to a wide range of secondary metabolites (Hildebrandt et al., 2015).

58

59 One amino acid biosynthesis pathway that remains largely unexplored for herbicide  
60 development is the diaminopimelate (DAP) pathway (Figure 1), which is responsible for the  
61 production of L-lysine (here after referred to as lysine) in plants and bacteria (Figure 1) (Hall  
62 and Soares da Costa, 2018). Animals, including humans, do not synthesise lysine, and  
63 therefore, must acquire it from dietary sources (Galili and Amir, 2013; Tomé and Bos, 2007).  
64 Consequently, specific chemical inhibition of the DAP pathway in plants is unlikely to result  
65 in cytotoxicity to animals and humans (Hutton et al., 2007). The DAP pathway commences  
66 with a condensation reaction between L-aspartate semialdehyde (ASA) and pyruvate to form  
67 (4*S*)-4-hydroxy-2,3,4,5-tetrahydro-(2*S*)-dipicolinic acid (HTPA), catalysed by HTPA synthase  
68 (EC 4.2.1.52), also known as dihydrodipicolinate synthase (DHDPS) (Griffin et al., 2012;  
69 Soares da Costa et al., 2017, 2015). HTPA is then reduced by dihydrodipicolinate reductase  
70 (DHDPR, EC 1.3.1.26) in the presence of NAD(P)H to produce 2,3,4,5-tetrahydrodipicolinate  
71 (THDP) (Christensen et al., 2016). In plants, THDP undergoes an amino-transfer by  
72 diaminopimelate aminotransferase (DAPAT, EC 2.6.1.83) to form L,L-DAP, which is  
73 converted to *meso*-DAP by diaminopimelate epimerase (DAPEpi, EC 5.1.1.7) (Hudson et al.,  
74 2005; McCoy et al., 2006). Lastly, *meso*-DAP is irreversibly decarboxylated by  
75 diaminopimelate decarboxylase (DAPDC, EC 4.1.1.20) to produce lysine (Peverelli and

76 Perugini, 2015). Lysine regulates flux through the pathway by binding allosterically to DHDPS  
77 and inhibiting the enzyme. Thus, DHDPS catalyses the rate-limiting step of the DAP pathway  
78 (Geng et al., 2013; Soares da Costa et al., 2016).  
79

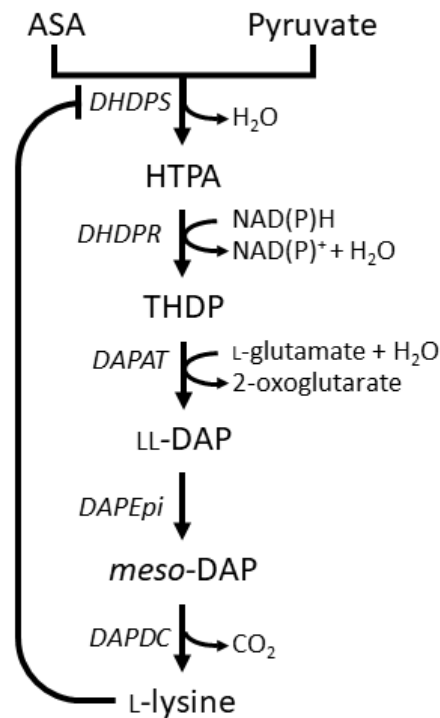

80  
81 **Figure 1: Lysine biosynthesis in plants.** Plants utilise the diaminopimelate (DAP) pathway,  
82 a branch of the aspartate-derived super-pathway, to synthesise L-lysine. Firstly, L-aspartate  
83 semialdehyde (ASA) and pyruvate are converted to (4*S*)-4-hydroxy-2,3,4,5-tetrahydro-(2*S*)-  
84 dipicolinic acid (HTPA) in a condensation reaction catalysed by dihydrodipicolinate synthase  
85 (DHDPS). Dihydrodipicolinate reductase (DHDPR) then catalyses an NAD(P)H-dependent  
86 reduction of HTPA to produce 2,3,4,5-tetrahydrodipicolinate (THDP). THDP subsequently  
87 undergoes an amino-transfer reaction with L-glutamate, catalysed by diaminopimelate  
88 aminotransferase (DAPAT), to yield L,L-DAP. L,L-DAP is converted to *meso*-DAP by  
89 diaminopimelate epimerase (DAPEpi) and lastly, *meso*-DAP is decarboxylated by  
90 diaminopimelate decarboxylase (DAPDC) to yield L-lysine, which imparts a negative feedback  
91 loop on DHDPS.

92  
93 Due to the central role of DHDPS in lysine production in plants, this enzyme has been proposed  
94 as a potential target for the development of herbicides (Griffin et al., 2012; Soares da Costa et  
95 al., 2017). Indeed, the lysine analogue *S*-(2-aminoethyl)-L-cysteine, has been shown to halt  
96 rooting of potato tuber discs at mid-micromolar concentrations (Perl et al., 1993; Ghislain et

97 al., 1995). However, given its poor *in vitro* potency against plant DHDPS, it is believed that  
 98 this analogue inhibits plant growth by competing with lysine for incorporation into proteins  
 99 rather than inhibition of the DHDPS enzyme (Ghislain et al., 1995; Perl et al., 1993). Plants  
 100 typically have two annotated DHDPS-encoding genes (*DHDPS*) (Supplementary Figure 1)  
 101 (Craciun et al., 2000; Sarrobert et al., 2000; Vauterin and Jacobs, 1994). In *Arabidopsis*  
 102 *thaliana*, these genes are *At3G60880* (*DHDPS1*) and *At2G45440* (*DHDPS2*), which encode  
 103 chloroplast-targeted AtDHDPS1 and AtDHDPS2, respectively (Jones-Held et al., 2012).  
 104 Double knockouts of *DHDPS1* and *DHDPS2* result in non-viable embryos even after  
 105 exogenous supplementation with lysine, indicating that DHDPS activity is essential (Jones-  
 106 Held et al., 2012). AtDHDPS enzymes exist as homotetramers (Figure 2A), with the active site  
 107 located within the ( $\beta/\alpha$ )<sub>8</sub>-barrel (Figure 2B) and the allosteric cleft in the tight-dimer interface  
 108 located in the interior of the structure (Figure 2C) (Griffin et al., 2012; Hall et al., 2021).  
 109

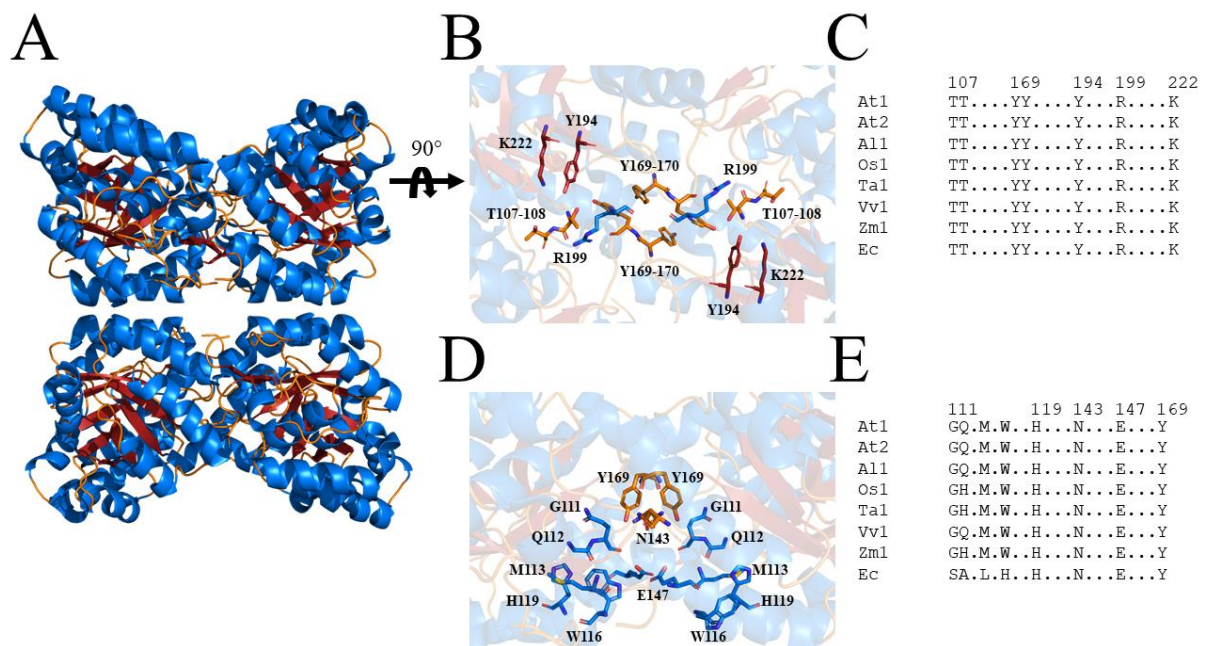

110  
 111 **Figure 2: Structure and sequence conservation of plant DHDPS enzymes.** (A) Cartoon  
 112 structure of *Arabidopsis thaliana* (At) DHDPS1 (PDB: 6VVI) in the unliganded form  
 113 illustrating the ‘back-to-back’ homotetramer conformation. (B) Cartoon structure of  
 114 AtDHDPS1, with residues critical for catalysis shown as sticks. (C) Multiple sequence  
 115 alignment of residues important for catalysis. (D) Cartoon structure of AtDHDPS1, with  
 116 residues important for lysine binding and allosteric regulation shown as sticks. Residues are  
 117 coloured by nitrogen (blue), oxygen (red) and sulfur (yellow). Images were generated using  
 118 *PyMOL* v 2.2 (Schrödinger). (E) Multiple sequence alignment of residues involved in allosteric

119 lysine binding. Sequences are AtDHDPS1 (At1; UNIPROT ID: Q9LZX6), AtDHDPS2 (At2;  
120 UNIPROT ID: Q9FVC8), *Arabidopsis lyrata* DHDPS1 (Al1; UNIPROT ID: D7LRV3) *Oryza*  
121 *sativa* DHDPS1 (Os1; UNIPROT ID: A0A0K0K9A6), *Triticum aestivum* DHDPS1 (Ta1;  
122 UNIPROT ID: P24846), *Vitis vinifera* DHDPS1 (Vv1; UNIPROT ID: A0A438E022), *Zea*  
123 *mays* DHDPS1 (Zm1; UNIPROT ID: P26259) and *Escherichia coli* (Ec) DHDPS (UNIPROT  
124 ID: P0A6L2). Residues are numbered according to AtDHDPS1 with dots (.) representing  
125 interspacing residues. Sequences were aligned in *BioEdit* (v 7.2.5) (Hall, 1999) using the  
126 *ClustalW* algorithm (Thompson et al., 1994).

127

128 In this study, we describe the first class of plant DHDPS inhibitors. We show that these  
129 compounds display micromolar potency *in vitro* and *in planta* against *A. thaliana* using a  
130 combination of enzyme kinetics, seedling and soil assays, whilst exhibiting no cytotoxic effects  
131 in bacterial or human cell lines at equivalent concentrations. Furthermore, we employ X-ray  
132 crystallography to show these compounds target a previously unexplored binding site within  
133 DHDPS, which is highly conserved amongst plant species. Thus, this study provides proof-of-  
134 concept that lysine biosynthesis represents a promising pathway to target for the development  
135 of herbicides with a new mode of action and highlights a novel DHDPS binding pocket to assist  
136 in the discovery of herbicide candidates.

137

## 138 **Results**

### 139 **High throughput chemical screen for inhibitor discovery**

140 A high throughput screen of a library of 87,648 compounds was conducted against recombinant  
141 DHDPS enzyme by the Walter and Eliza Hall Institute High Throughput Chemical Screening  
142 Facility (Melbourne, Australia). The *o*-aminobenzaldehyde (*o*-ABA) colourimetric assay was  
143 used to estimate DHDPS activity via the formation of a purple chromophore that can be  
144 measured at 520-540 nm (Yugari and Gilvarg, 1965). Using a cut-off equal to the mean  $\pm 3\times$   
145 standard deviation for classification as a hit compound, 435 compounds out of 87,648 were  
146 identified as hits at 20 mM (hit rate = 0.50%). The activity of these 435 compounds was  
147 confirmed at the same concentration as the primary screen, resulting in 38 compounds  
148 demonstrating >40% inhibition of the DHDPS enzymatic reaction (confirmation rate = 8.7%).  
149 A counter screen was employed to exclude false-positive compounds i.e., compounds that  
150 interacted with *o*-ABA detection or absorbance quantification. The compounds that displayed  
151 confirmed DHDPS inhibition were subsequently progressed to full dose response titration

152 assays using recombinant DHDPS. One promising compound from the screen was (Z)-2-(5-(4-  
153 fluorobenzylidene)-2,4-dioxothiazolidin-3-yl)acetic acid (FBDTA). The characterisation of  
154 two thiazolidinedione analogues containing methoxy substituents, MBDTA-1 and MBDTA-2,  
155 will be discussed here (Figure 3).  
156

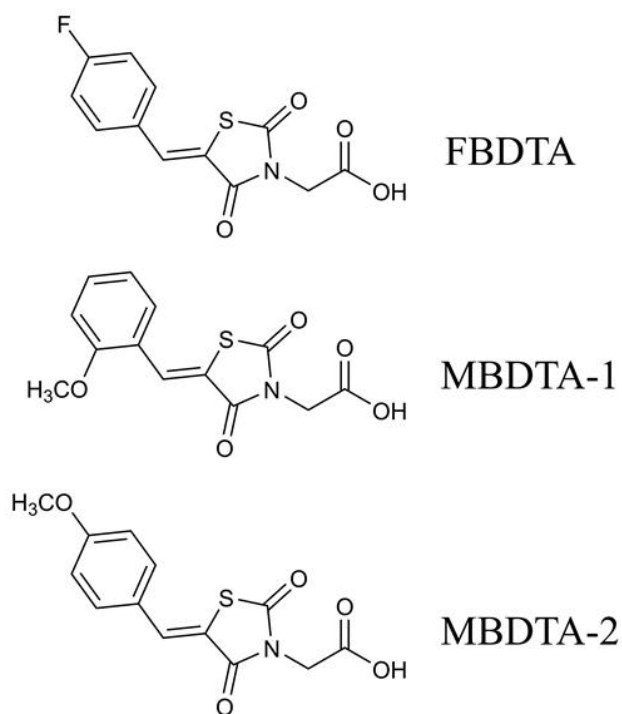

157  
158 **Figure 3: Structure of DHDPS inhibitors.** Chemical structures of the hit compound, (Z)-2-  
159 (5-(4-fluorobenzylidene)-2,4-dioxothiazolidin-3-yl)acetic acid (FBDTA), and two analogues,  
160 (Z)-2-(5-(2-methoxybenzylidene)-2,4-dioxothiazolidin-3-yl)acetic acid (MBDTA-1) and (Z)-  
161 2-(5-(4-methoxybenzylidene)-2,4-dioxothiazolidin-3-yl)acetic acid (MBDTA-2). Image was  
162 generated using *ChemDraw* v 18.1 (PerkinElmer).  
163

### 164 Efficacy of inhibitors on recombinant DHDPS

165 The inhibitory activity of MBDTA-1 and MBDTA-2 against both recombinant *A. thaliana*  
166 DHDPS proteins was quantitated using a DHDPS-DHDPR coupled assay (Atkinson et al.,  
167 2013). This was achieved by titrating different concentrations of each compound with  
168 substrates fixed at previously determined Michaelis-Menten constant values (Griffin et al.,  
169 2012; Hall et al., 2021). The  $IC_{50}$  values of MBDTA-1 and MBDTA-2 against AtDHDPS1  
170 were determined to be  $126 \pm 6.50 \mu\text{M}$  and  $63.3 \pm 1.80 \mu\text{M}$ , respectively (Figure 4A). Similarly,  
171 the dose response curves for AtDHDPS2 yielded  $IC_{50}$  values of  $116 \pm 5.20 \mu\text{M}$  and  $64.0 \pm 1.00$   
172  $\mu\text{M}$  for MBDTA-1 and MBDTA-2, respectively (Figure 4B). As these compounds represent a

173 novel class of inhibitors of plant DHDPS, we set out to assess the mechanism of inhibition by  
174 examining the binding of MBDTA-2 to DHDPS using X-ray crystallography.  
175

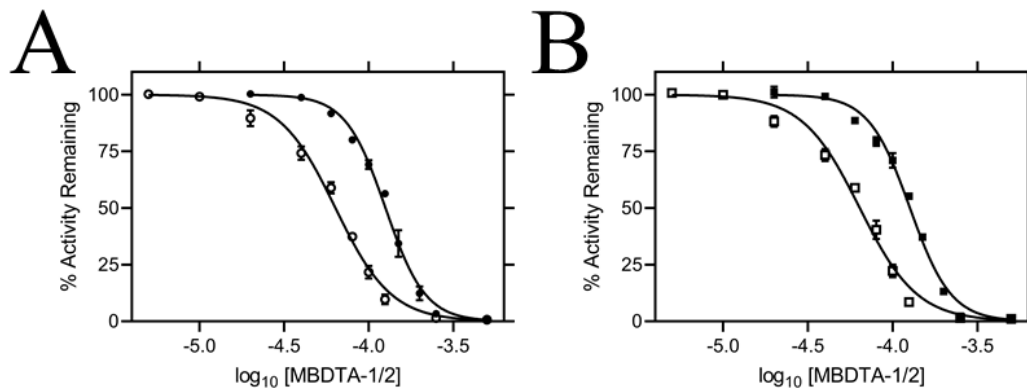

176  
177 **Figure 4: *In vitro* potency of DHDPS inhibitors.** Dose responses of MBDTA-1 (● or ■) and  
178 MBDTA-2 (○ or □) against recombinant (A) AtDHDPS1 and (B) AtDHDPS2. Initial enzyme  
179 rates were normalised against a vehicle control (1% (v/v) DMSO). Normalised data (% activity  
180 remaining) is plotted as a function of log<sub>10</sub>[inhibitor] and fitted to a nonlinear regression model  
181 (solid line) ( $R^2 = 0.99$ ). Data represents mean  $\pm$  S.E.M. ( $N = 3$ ).

182

183 **Figure 4 – Source Data 1: *In vitro* dose response kinetic data.**

184

### 185 **Molecular basis for inhibitor binding**

186 To probe the molecular determinants for inhibition, recombinant AtDHDPS1 was co-  
187 crystallised with MBDTA-2 using the same crystallisation conditions as for the apo enzyme  
188 with the addition of inhibitor (Hall et al., 2021). Diffraction data were obtained at a maximal  
189 resolution of 2.29 Å, phases solved by molecular replacement and repeating rounds of model  
190 building and refinement were performed that allowed us to generate an atomic inhibitor-bound  
191 model (Figure 5A, Table 1). We initially found several MBDTA-2 molecules at the crystal  
192 contact formed between protein molecules at chains B and D. Specifically, two parallel  
193 MBDTA-2 molecules were found bound to H187 (of the symmetry mate) and F210 with  
194 complete occupancy. However, given that these molecules were found solely at the crystal  
195 interface and were absent in chains A and C, they were assumed to be a result of non-specific  
196 binding.

197

198 Closer inspection of the crystal structure revealed the presence of four MBDTA-2 molecules  
199 bound at the center of the homotetrameric protein (Figure 5A), in antiparallel pairs with each



200 molecule, which were stabilised by interactions across three of the monomers (Figure 5B).  
201 Interestingly, this pocket, albeit distinct to the lysine binding site, shares two residues with it,  
202 namely W116 and E147 (Figure 2C). Specifically, the methoxy group of MBDTA-2 interacts  
203 with W116, E147 and H150 from chain B, while the carboxyl tail interacts with S115 from  
204 chain A as well as H150 and Q154 from chain C (Figure 5C). Additionally, we observed that  
205 upon binding, MBDTA-2 forces D117 to adopt a different rotamer conformation, which in  
206 turn, results in W116 assuming a different conformation. It must be noted that the four  
207 MBDTA-2 molecules were present with 50% occupancy. Consequently, each of the two  
208 moving residues, D117 and W116, adopt two distinct rotamer conformations, one of the apo-  
209 and one of the ligand-bound states of AtDHDPS1. Given that no major rotamer changes or  
210 movement of catalytically important residues were noted, the exact mechanism of inhibition  
211 remains elusive. Nevertheless, this indicates the presence of a novel DHDPS allosteric pocket  
212 that has not been previously exploited for inhibitor discovery. Moreover, an alignment of the  
213 primary structure of several DHDPS enzymes from plant species indicates that the residues  
214 involved in MBDTA-2 binding are highly conserved across both monocotyledons and  
215 dicotyledons (Figure 5D), and therefore should allow for broad spectrum inhibition.  
216

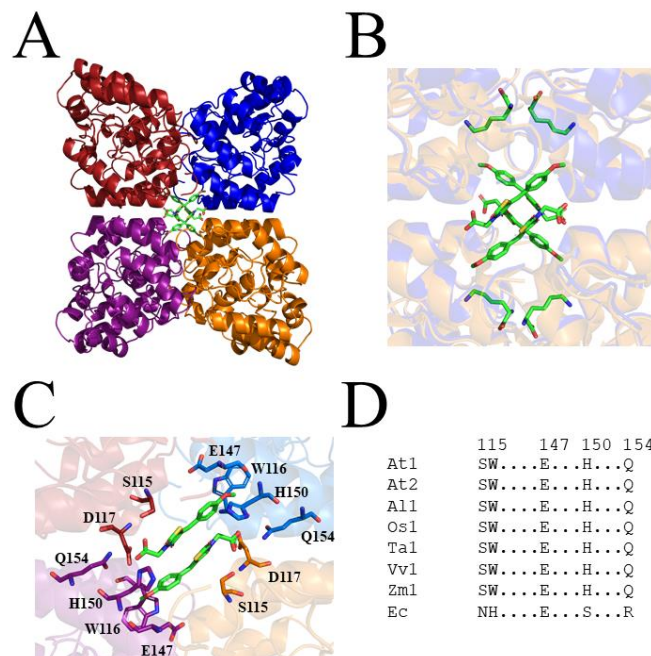

217  
218 **Figure 5: Crystal structure of AtDHDPS1 bound to MBDTA-2.** (A) Cartoon view of overall  
219 AtDHDPS1 quaternary (tetrameric) structure, illustrating the binding sites for MBDTA-2 at  
220 the center of the tetramer. (B) Overlay of the lysine-bound (PDB: 6VVH) and MBDTA-2  
221 bound structures. (C) Close-up of inhibitor binding pocket, with interacting residues shown as

222 sticks. Lysine and MBDTA-2 are shown as green sticks and coloured by nitrogen (blue),  
 223 oxygen (red) and sulfur (yellow). Images were generated using *PyMOL* v 2.2 (Schrödinger).  
 224 (D) Sequence alignment of residues involved in MBDTA-2 binding from *A. thaliana* DHDPS1  
 225 (At1; UNIPROT ID: Q9LZX6), *A. thaliana* DHDPS2 (At2; UNIPROT ID: Q9FVC8), *A. lyrata*  
 226 DHDPS1 (Al1; UNIPROT ID: D7LRV3), *O. sativa* DHDPS1 (Os1; UNIPROT ID:  
 227 A0A0K0K9A6), *T. aestivum* DHDPS1 (Ta1; UNIPROT ID: P24846), *V. vinifera* DHDPS1  
 228 (Vv1; UNIPROT ID: A0A438E022), *Z. mays* DHDPS1 (Zm1; UNIPROT ID: P26259), and  
 229 *E. coli* (Ec) DHDPS (UNIPROT ID: P0A6L2). Residues are numbered according to  
 230 *A. thaliana* DHDPS1 with dots (.) representing interspacing residues. Sequences were aligned  
 231 in *BioEdit* (v 7.2.5) using the *ClustalW* algorithm.

232

233 **Table 1: Summary of MBDTA-2 bound AtDHDPS1 crystallographic data collection,**  
 234 **processing and refinement statistics.**

| Data collection                                  | AtDHDPS1 + MBDTA-2               |
|--------------------------------------------------|----------------------------------|
| Space group                                      | P4 <sub>1</sub> 2 <sub>1</sub> 2 |
| Unit cell parameters (Å)                         | 94.47, 94.47, 181.41             |
| Resolution (Å)                                   | 20-2.29 (2.43-2.29)              |
| No. of observations                              | 491320 (74297)                   |
| No. of unique reflections                        | 37390 (5768)                     |
| Completeness (%)                                 | 99.4 (96.6)                      |
| Redundancy                                       | 13.1 (12.8)                      |
| $R_{\text{merge}}$ (%)                           | 9.9 (39.1)                       |
| $R_{\text{meas}}$ (%)                            | 10.0 (40.7)                      |
| $CC_{1/2}$                                       | 99.9 (97.8)                      |
| Average $I/\sigma(I)$                            | 27.9 (7.9)                       |
| <b>Refinement</b>                                |                                  |
| $R$ (%)                                          | 18.3                             |
| $R_{\text{free}}$ (%)                            | 22.6                             |
| No. (%) of reflections in test set               | 1071                             |
| No. of protein molecules per asu                 | 2                                |
| r.m.s.d bond length (Å)                          | 0.007                            |
| r.m.s.d bond angle (°)                           | 1.415                            |
| Average B-factors (Å <sup>2</sup> ) <sup>a</sup> |                                  |

|                                     |       |
|-------------------------------------|-------|
| Protein molecules                   | 44.52 |
| Ligand molecules                    | 60.01 |
| Water molecules                     | 40.33 |
| Ramachandran plot <sup>b</sup>      |       |
| Residues other than Gly and Pro in: |       |
| Most favored regions (%)            | 98.0  |
| Additionally allowed regions (%)    | 2.0   |
| Disallowed regions (%)              | 0.0   |
| PDB code                            | 7MDS  |

235 Values in parentheses are for the highest-resolution shell.

236 <sup>a</sup> Calculated by *BAVERAGE* in CCP4 Suite (Winn et al., 2011).

237 <sup>b</sup> Calculated using *MolProbity* (Chen et al., 2010).

238

### 239 **Specificity of DHDPS inhibitors**

240 Following determination of the binding site, we examined the specificity of MBDTA-1 and  
241 MBDTA-2 to determine if any future applications would have off-target effects. Firstly, the  
242 cytotoxicity of the inhibitors was examined against the HepG2 and HEK293 cell lines using  
243 the 3-(4,5-dimethylthiazol-2-yl)-2,5-diphenyltetrazolium bromide (MTT) assay  
244 (Supplementary Figure 2A-B). At the highest concentration assessed (400  $\mu\text{M}$ ), treatment with  
245 the inhibitors did not affect the viability of either cell line relative to the vehicle control.  
246 Secondly, the effect of the inhibitors on several bacterial species commonly found in the human  
247 flora and soil microbiome was assessed by measuring their minimum inhibitory concentrations.  
248 No inhibition of bacterial growth was observed up to 128  $\mu\text{g}\cdot\text{mL}^{-1}$  (equivalent to  $\sim 400 \mu\text{M}$ )  
249 (Table 2), indicating that these DHDPS inhibitors have specificity directed towards plants.

250 **Table 2: Minimum inhibitory concentration (MIC) values for MBDTA-1 and MBDTA-2**  
251 **against several bacterial strains.**

|                                  | MBDTA-1 MIC<br>( $\mu\text{g}\cdot\text{mL}^{-1}$ ) | MBDTA-2 MIC<br>( $\mu\text{g}\cdot\text{mL}^{-1}$ ) |
|----------------------------------|-----------------------------------------------------|-----------------------------------------------------|
| <b>Human Flora</b>               |                                                     |                                                     |
| Enterococcus spp.                | >128                                                | >128                                                |
| <i>Staphylococcus aureus</i>     | >128                                                | >128                                                |
| <i>Escherichia coli</i>          | >128                                                | >128                                                |
| <b>Soil Bacteria</b>             |                                                     |                                                     |
| <i>Enterobacter ludwigii</i>     | >128                                                | >128                                                |
| Arthrobacter sp.                 | >128                                                | >128                                                |
| <i>Enterobacter cancerogenus</i> | >128                                                | >128                                                |
| <i>Cedecea davisae</i>           | >128                                                | >128                                                |
| <i>Rhodococcus erthropolis</i>   | >128                                                | >128                                                |

252

253 **Table 2 – Source Data 1: Antibacterial MIC data.**

254

### 255 **Herbicidal efficacy**

256 Given the promising *in vitro* properties of the inhibitors, we determined their herbicidal  
257 efficacy against *A. thaliana*, initially using seedling agar assays. At high micromolar  
258 concentrations of both MBDTA-1 (Figure 6A) and MBDTA-2 (Figure 7A), growth was  
259 completely attenuated, and most seeds were unable to germinate. Upon quantitation of root  
260 lengths, we determined an  $\text{IC}_{50}$  of  $98.1 \pm 4.34 \mu\text{M}$  and  $47.4 \pm 0.450 \mu\text{M}$  for MBDTA-1 (Figure  
261 6B) and MBDTA-2 (Figure 7B), respectively. Based on these results, we examined their pre-  
262 emergence effect on soil-grown *A. thaliana*. Specifically, compounds were dissolved in a  
263 solution containing a non-ionic organic surfactant (Agral) and seeds were treated immediately  
264 after sowing on soil. The vehicle control-treated plants (Figure 8A) were used as a benchmark  
265 to visually assess the effects of inhibitors. The growth of *A. thaliana* in the presence of  
266 MBDTA-1 (Figure 8B) or MBDTA-2 (Figure 8C) at  $300 \text{ mg}\cdot\text{L}^{-1}$  was severely impeded as  
267 evidenced by the growth area relative to the DMSO control (Figure 8D), wherein few seeds

268 were able to germinate. This is consistent with the results observed at the highest concentrations  
269 of inhibitor on agar. Furthermore, the *A. thaliana* seeds capable of germinating in the presence  
270 of  $300 \text{ mg}\cdot\text{L}^{-1}$  MBDTA-2 were halted at the cotyledon stage before the generation of true  
271 leaves. As such, our newly discovered MBDTA compounds represent the first DAP pathway  
272 inhibitors with soil efficacy against plants.  
273

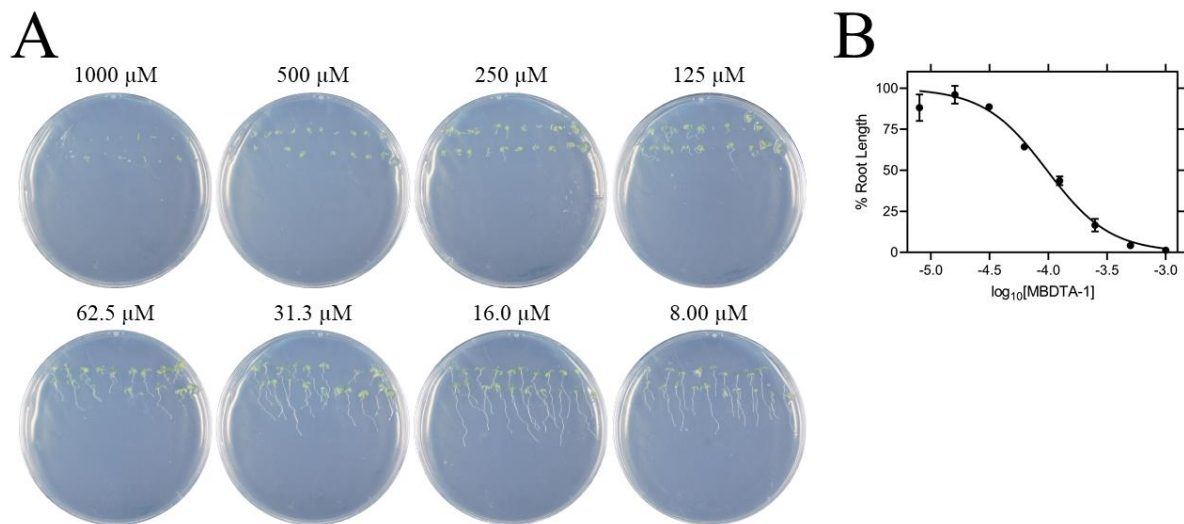

274  
275 **Figure 6: Effect of MBDTA-1 on agar-grown *A. thaliana*.** (A) *A. thaliana* grown on  
276 Gamborg modified Murashige Skoog media treated with MBDTA-1 at varying concentrations  
277 after 7 days. (B) *A. thaliana* root lengths after treatment with increasing concentrations of  
278 MBDTA-1. Root lengths were determined using *ImageJ* v 1.53b and normalised against a  
279 vehicle control (1% (v/v) DMSO). Normalised data (●) (% root length) is plotted as a function  
280 of log<sub>10</sub>[inhibitor] and fitted to a nonlinear regression model (solid line) ( $R^2 = 0.99$ ). Data  
281 represents mean  $\pm$  S.E.M. ( $N = 3$ ).

282

283 **Figure 6 – Source Data 1: *In planta* MBDTA-1 dose response data.**

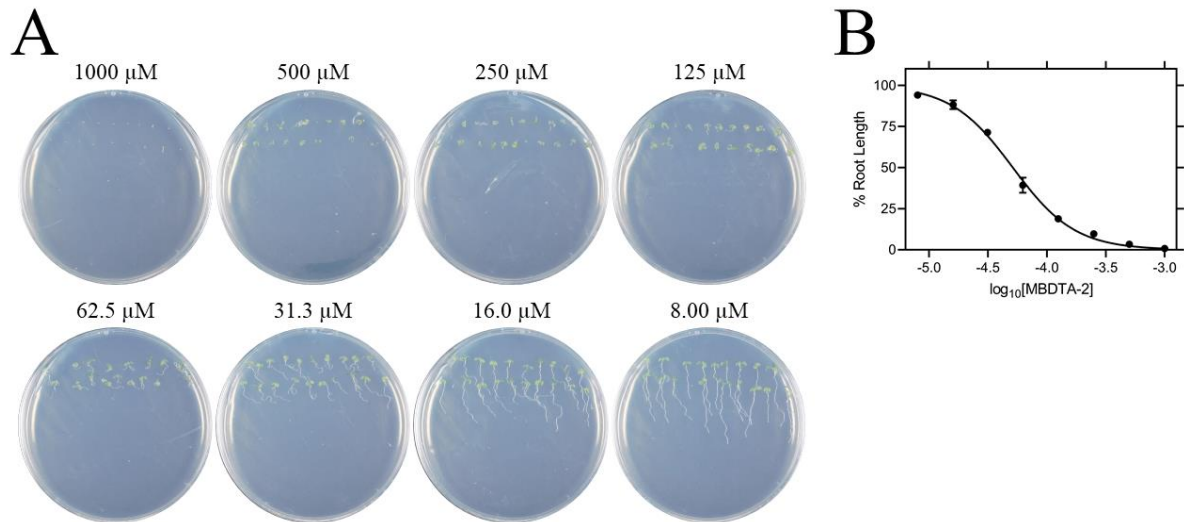

284

285 **Figure 7: Effect of MBDTA-2 on agar-grown *A. thaliana*.** (A) *A. thaliana* grown on  
286 Gamborg modified Murashige Skoog media treated with MBDTA-2 at varying concentrations  
287 after 7 days. (B) *A. thaliana* root lengths after treatment with increasing concentrations of  
288 MBDTA-2. Root lengths were determined using *ImageJ* v 1.53b and normalised against a  
289 vehicle control (1% (v/v) DMSO). Normalised data (●) (% root length) is plotted as a function  
290 of log<sub>10</sub>[inhibitor] and fitted to a nonlinear regression model (solid line) ( $R^2 = 0.99$ ). Data  
291 represents mean  $\pm$  S.E.M. ( $N = 3$ ).

292

293 **Figure 7 – Source Data 1: *In planta* MBDTA-2 dose response data.**

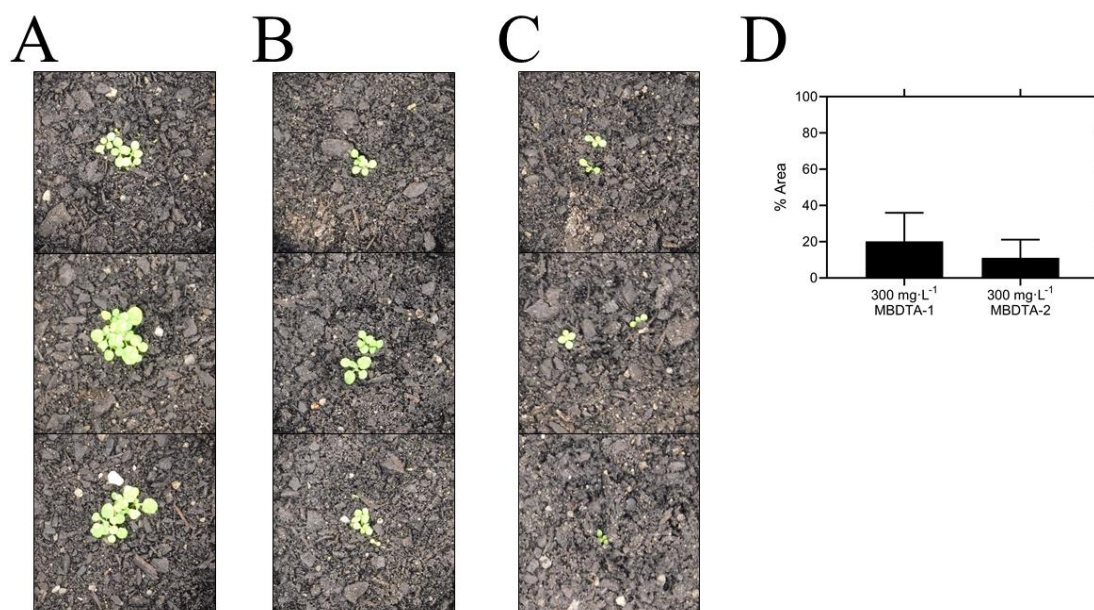

294

295 **Figure 8: Pre-emergence efficacy of inhibitors on *A. thaliana* grown in soil.** Treatments of  
296 (A) vehicle control (1% (v/v) DMSO), (B) 300 mg·L<sup>-1</sup> MBDTA-1 and (C) 300 mg·L<sup>-1</sup>  
297 MBDTA-2 given at day 0 (first day under controlled environment room conditions). A  
298 representative in triplicate of the biological replicates is shown vertically. (D) Leaf area of  
299 MBDTA-1/2 treated *A. thaliana*. Area was determined using *ImageJ* v 1.53b and normalised  
300 against a vehicle control (1% (v/v) DMSO). Data represents mean ± S.D. (*n* = 3).

301

302 **Figure 8 – Source Data 1: *In planta* MBDTA-1/2 soil efficacy data.**

303

## 304 Discussion

305 The lack of herbicides with novel modes of action entering the market in the past three decades  
306 has led to an over-reliance on our current agrichemicals, which has contributed to the rapid  
307 generation of resistance. Although the DAP pathway has gained attention as a way to increase  
308 the nutritional content of lysine in crops (Wang et al., 2017), it has remained an unexplored  
309 target for the development of herbicides until now. DHDPS catalyses the first step of the DAP  
310 pathway and is commonly duplicated in plant species, including *A. thaliana*. Both DHDPS  
311 proteins are localised to the chloroplast and share >85% of primary structure identity, with the  
312 majority of differences found at the N-terminus. Although DHDPS has been shown to be  
313 essential in *A. thaliana* (Jones-Held et al., 2012), there have been no published inhibitors of the  
314 plant enzymes, with much of the focus on inhibitors of bacterial DHDPS as possible new  
315 antibiotics.

316 Our study describes the discovery of the first plant DHDPS inhibitors, with two MBDTA  
317 analogues identified and characterised here. The mode of inhibition was shown to be via a  
318 novel binding pocket adjacent to the lysine binding site, which results in the allosteric inhibition  
319 of the enzyme. Lysine has recently been shown to differentially inhibit the AtDHDPS isoforms,  
320 with AtDHDPS1 being 10-fold more sensitive to the allosteric inhibitor (Hall et al., 2021). In  
321 this study, we demonstrate that the MBDTA compounds have similar inhibitory effects against  
322 both enzymes. This further supports our crystallography data that shows that MBDTA-2 binds  
323 in a pocket adjacent to the lysine allosteric site and is likely acting in a different way. However,  
324 the exact mechanism of inhibition, much like lysine-mediated allostery, remains elusive.  
325 Moreover, we found that this binding pocket is conserved across multiple plant species,  
326 including both monocots and dicots. Importantly, our compounds lacked off-target toxicity,  
327 whilst resulting in the inhibition of germination and growth of *A. thaliana* seedlings on  
328 solidified media and in soil. However, as expected, plant inhibition was more pronounced on  
329 media likely due to the stability, distribution and persistence of the compounds. Nevertheless,  
330 the assays performed on soil demonstrate their potential applicability as pre-emergence  
331 treatments. It would also be of interest to investigate the metabolic shifts in plants treated with  
332 inhibitors and determine if there is a toxic build-up of other amino acids such as threonine,  
333 which has been observed in *DHDPS* knockout experiments (Sarrobot et al., 2000). Indeed, a  
334 common trait of systemic herbicides is that their efficacy is often related to the cascading  
335 consequences of inhibiting a key reaction, rather than inhibition of the reaction itself (Hall et  
336 al., 2020).

337  
338 Developing enzyme inhibitors into a commercial product is an arduous and costly process.  
339 Optimisation of phytotoxicity, water solubility, cell wall penetration, translocation, soil/water  
340 persistence and formulation must all be considered. The MBDTA compounds described here  
341 represent an attractive avenue to pursue and with the elucidation of a novel binding pocket  
342 within DHDPS, it may be possible to rationally improve their potency guided by the  
343 crystallography data. Alternatively, novel chemical scaffolds could be explored to target the  
344 DHDPS pocket identified. The inhibitors must be able to traverse the chloroplast membrane in  
345 order to reach the DHDPS target and be amenable to post-emergence application. It would also  
346 be of interest to study inhibitors with increased hydrophilicity and thus, potentially enhanced  
347 transport through the cell wall. Importantly, DHDPS inhibitors could also be used in  
348 conjunction with other herbicides as part of a combinatorial treatment to yield synergistic



349 responses and circumvent resistance mechanisms to tackle the global rise in herbicide resistant  
350 weeds.

351

## 352 **Materials and Methods**

### 353 **High throughput chemical screen and analogue synthesis**

354 A high throughput screen of a library of 87,648 compounds was conducted against recombinant  
355 DHDPS enzyme by the Walter and Eliza Hall Institute High Throughput Chemical Screening  
356 Facility (Melbourne, Australia). The *o*-ABA colourimetric assay employed assesses DHDPS  
357 activity via the formation of a purple chromophore that can be measured at 520-540 nm (Yugari  
358 and Gilvarg, 1965). The assay was miniaturised so it could be performed in 384-well plates.  
359 For the primary screen, reactions comprised 0.5 mg·mL<sup>-1</sup> DHDPS, 0.5 mM sodium pyruvate  
360 and 0.5 mM ASA. Library compounds were added at final concentrations of 20 mM, with  
361 DMSO concentrations kept at 0.4% (v/v). After ASA addition, reactions were incubated at  
362 25 °C for 15 mins, before a final concentration of 350 mM HCl was added to stop the reaction.  
363 *o*-ABA was subsequently added to a final concentration of 0.44 mg·mL<sup>-1</sup>, plates incubated at  
364 room temperature for 1 hr, and absorbance quantified at 540 nm. Vehicle (DMSO) was used  
365 as positive controls, and negative controls lacked ASA. For the secondary screen, 11-point dose  
366 response curves were generated using the same reactions as described above. A counter screen  
367 was conducted using the same set-up albeit without the inclusion library compounds before the  
368 addition of 350 mM HCl. Library compounds were then added after the reaction was stopped,  
369 followed by *o*-ABA to a final concentration of 0.44 mg·mL<sup>-1</sup>. The plates were subsequently  
370 incubated at room temperature for 1 hr, and absorbance quantified at 540 nm. Analogues were  
371 designed and synthesised using the methods described in previous and contemporary work  
372 (Perugini et al., 2018).

373

### 374 **Expression and purification of *A. thaliana* DHDPS enzymes**

375 Both DHDPS isoforms from *A. thaliana* were expressed and purified as previously described  
376 (Hall et al., 2021). Briefly, AtDHDPS isoforms were expressed in *Escherichia coli* BL21 (DE3)  
377 cells, with AtDHDPS2 requiring the GroEL/ES chaperone complex to facilitate correct folding.  
378 Purification was performed using immobilised metal affinity chromatography. Lastly, fusion  
379 tags were cleaved by human rhinovirus 3C or tobacco etch virus protease for AtDHDPS1 and  
380 AtDHDPS2, respectively, whilst simultaneously dialysing into storage buffer (20 mM Tris,  
381 150 mM NaCl, 0.5 mM TCEP, pH 8.0).

## 382 **Enzyme kinetics**

383 DHDPS enzyme activity was determined using the DHDPS-DHDPR coupled assay as  
384 previously described by measuring the oxidation of NADPH (Atkinson et al., 2013; Hall et al.,  
385 2021). Assays were carried out in a Cary 4000 UV/Vis spectrophotometer at 30 °C with  
386 substrates fixed at the previously determined Michaelis-Menten constant values (Griffin et al.,  
387 2012; Hall et al., 2021). Inhibitor was titrated against AtDHDPS enzymes and reactions were  
388 incubated at 30 °C for 12 mins before initiation with ASA. Initial velocity data were normalised  
389 against a vehicle (DMSO) control and analysed using Equation 1 (log(inhibitor) vs. normalized  
390 response - variable slope, *GraphPad Prism* v 8.3). Dose responses were performed with 3  
391 technical replicates for each concentration of compound. Dose responses were repeated with 3  
392 biological replicates, each using a new stock of reagents.

393

394 Equation 1:

$$395 Y = 100 / (1 + 10^{((\text{LogIC}_{50} - X) \times \text{HillSlope})})$$

396 Where Y is the normalised rate, logIC<sub>50</sub> is the logarithmic concentration of ligand resulting in  
397 50% activity, X is the concentration of ligand, and Hill Slope is the steepness of the curve.

398

## 399 **X-ray crystallography**

400 AtDHDPS1 was co-crystallised as previously described in the presence of MBDTA-2 (Hall et  
401 al., 2021). Briefly, protein (8.5 mg·mL<sup>-1</sup>) was incubated at 20 °C with MBDTA-2 at a final  
402 concentration of 1 mM (in 2% (v/v) DMSO) before being added in a 1:1 ratio to a reservoir  
403 solution containing 1.4 M (NH<sub>4</sub>)<sub>2</sub>SO<sub>4</sub>, 0.1 M NaCl, 0.1 M HEPES (pH 7.5) and 1 mM  
404 MBDTA-2 (in 2% (v/v) DMSO). Plates were incubated at 20 °C. Crystals were briefly dipped  
405 in cryo-protectant (1.4 M (NH<sub>4</sub>)<sub>2</sub>SO<sub>4</sub>, 0.1 M NaCl, 0.1 M HEPES (pH 7.5), 1 mM MBDTA-2  
406 (in 2% (v/v) DMSO) and 20% (v/v) glycerol) and flash frozen in liquid nitrogen. Data were  
407 collected at the Australian Synchrotron using the MX2 beamline (Aragão et al., 2018). A total  
408 of 1800 diffraction images were collected with 0.1° oscillation using an EIGER 16M detector  
409 at a distance of 350 mm, with 20% beam attenuation for a total exposure time of 18 sec. X-ray  
410 data were integrated using *XDS* (Kabsch, 2010) and scaled with *AIMLESS* (Evans and  
411 Murshudov, 2013) before phases were determined by molecular replacement through *Auto-*  
412 *Rickshaw* (Panjikar et al., 2005) with AtDHDPS1 (PDB ID: 6VVI) used as a search model  
413 (Hall et al., 2021). Manual building was performed in *COOT* (Emsley et al., 2010) followed  
414 by refinement employing *REFMAC5* in the *CCP4i2* (v7.0) software suite (Emsley et al., 2010;  
415 Murshudov et al., 2011; Winn et al., 2011). SMILES string of the inhibitor (MBDTA-2) was

416 processed through *AceDRG* to generate the coordinate and cif file (Long et al., 2017).  
417 Validation was completed using *MolProbity* (Chen et al., 2010). The structure of MBDTA-2  
418 bound to AtDHDPS1 is deposited in the Protein Data Bank as 7MDS.

419

#### 420 **Toxicity assays**

421 The toxicity of inhibitors against human HepG2 and HEK293 cell lines was assessed using the  
422 MTT viability assay as previously described (Soares da Costa et al., 2012). In brief, the cells  
423 were suspended in Dulbecco-modified Eagle's medium containing 10% (v/v) fetal bovine  
424 serum and then seeded in 96-well tissue culture plates at 5,000 cells per well. After 24 hrs, cells  
425 were treated with 50 – 400  $\mu$ M of MBDTA-1 or MBDTA-2, such that the DMSO concentration  
426 was consistent at 1% (v/v) in all wells. Alternatively, cells were treated with the cytotoxic  
427 defensin protein at 100  $\mu$ M (Baxter et al., 2017). After treatment for 48 hrs, MTT cell  
428 proliferation reagent was added to each well and incubated for 3 hrs at 37 °C. The percentage  
429 viability remaining reported is relative to the vehicle control of 1% (v/v) DMSO. Assays were  
430 performed in 3 biological replicates, using a different batch of reagents and cells.

431

#### 432 **Antibacterial assays**

433 The minimum inhibitory concentration (MIC) for MBDTA-1 and MBDTA-2 was determined  
434 against a panel of Gram-positive and Gram-negative bacteria using a broth microdilution  
435 method according to guidelines defined by the Clinical Laboratory Standards Institute  
436 (National Committee for Clinical Laboratory Standards, 2004, 2003). An inoculum of  $1 \times 10^5$   
437 colony forming units per mL was used and the testing conducted using tryptic soy broth in 96-  
438 well plates. Growth was assessed after incubation at 37 °C for 20 hrs by measuring the  
439 absorbance at 600 nm. The MIC value is defined as the lowest concentration of inhibitor where  
440 no bacterial growth is observed. Experiments were performed in 3 biological replicates, using  
441 a different stock of reagents and bacterial culture.

442

#### 443 **Seedling assays**

444 Inhibitors were dissolved in  $1 \times$  Gamborg modified/ Murashige Skoog (GM/MS) media to final  
445 concentrations of 8 – 1000  $\mu$ M. Specifically, media were prepared with 0.8% (w/v) plant grade  
446 agar and 1% (w/v) sucrose before sterilisation (Lindsey et al., 2017). *A. thaliana* seeds were  
447 surface sterilised by soaking in 80% (v/v) ethanol for 5 mins, followed by a 15 min incubation  
448 in bleach solution containing 1% (v/v) active NaClO and rinsed in excess sterile water before  
449 placing onto agar-containing inhibitors (Boyes et al., 2001). *A. thaliana* seeds were stratified

450 at 4 °C for 72 hrs in the dark prior to relocation to a controlled environment room (CER), where  
451 seeds were grown at  $22 \pm 0.5$  °C at  $60 \pm 10\%$  humidity with light produced by cool white  
452 fluorescent lights at a rate of  $\sim 110 \mu\text{mol}\cdot\text{m}^{-2}\cdot\text{s}^{-1}$  over long-day conditions (16 hrs light: 8 hrs  
453 dark) (Boyes et al., 2001). Plates were positioned upright to allow roots to grow downwards  
454 and after 7 days, images were taken, and root length determined using *ImageJ* (v 1.53b)  
455 (Rasband, 2011). Outliers were identified using the  $1.5 \times$  interquartile range method (Tukey,  
456 1977). Resulting data were analysed using Equation 1 (log(inhibitor) vs. normalized response  
457 - variable slope, *GraphPad Prism* v 8.3). No DMSO and vehicle (1% (v/v) DMSO) controls  
458 were also employed. Assays were carried out with 20 technical replicates (i.e. seeds) per  
459 experiment and were repeated in 3 biological replicates, with each biological replicate using a  
460 different stock of reagents and batch of seeds.

461

#### 462 **Soil assays**

463 Inhibitors were prepared in DMSO and diluted to  $300 \text{ mg}\cdot\text{L}^{-1}$  (1% (v/v) DMSO) in H<sub>2</sub>O  
464 containing 0.01% (v/v) Agral (Syngenta, North Ryde, NSW, Australia). *A. thaliana* seeds were  
465 surface sterilised as above and resuspended in 0.1% (w/v) agar before stratification.  
466 Subsequently,  $\sim 30$  seeds were sown into fine soil and treated with 1 mL of compound or vehicle  
467 control just prior to transfer to a CER and images taken after 7 days. Area analysis was  
468 performed using colour thresholding in *ImageJ* (v 1.53b) and normalised against the DMSO  
469 control (Corral et al., 2017; Rasband, 2011). Assays were carried out across 3 technical  
470 replicates (i.e., pots) using the same batch of reagents and seed stock.

## 471 **Acknowledgements**

472 T.P.S.C. would like to thank the National Health and Medical Research Council of Australia  
473 (APP1091976) and Australian Research Council (DE190100806) for fellowship and funding  
474 support, and M.A.P. and S.P. the Australian Research Council for funding support  
475 (DP150103313). A.R.G would like to thank the Australian Research Council Research Hub for  
476 Medicinal Agriculture (IH180100006) for support. C.J.H. is supported by La Trobe University  
477 Postgraduate Research scholarships. R.M.C. is a recipient of an Australian Government  
478 Research Training Program Scholarship and a LIMS Write-Up Award. This research was  
479 supported by the Defence Science Institute, an initiative of the State Government of Victoria,  
480 with a scholarship awarded to J.A.W, who is also the recipient of a Research Training Program  
481 scholarship. We thank Dr Grant Pearce (University of Canterbury, New Zealand) for supplying  
482 pET151/D-Topo harbouring the DHDPS2/*dapA2* gene and Professor Ashley Franks (La Trobe  
483 University, Australia) for supplying soil bacterial isolates. We acknowledge the use of the MX2  
484 beamline at the Australian Synchrotron, part of ANSTO, and employed the Australian Cancer  
485 Research Foundation (ACRF) detector. We acknowledge the CSIRO Collaborative  
486 Crystallisation Centre ([www.csiro/C3](http://www.csiro/C3); Melbourne, Australia). We also thank the La Trobe  
487 University Comprehensive Proteomics Platform for providing infrastructure support.

488

## 489 **Author contributions**

490 T.P.S.C., C.J.H., S.P., B.M.A., A.R.G. and M.A.P. designed experiments; T.P.S.C., C.J.H.,  
491 S.P., J.A.W., R.M.C. and S.B. performed experiments and analysed data; T.P.S.C. and C.J.H.  
492 wrote the manuscript; all authors provided revisions and edits.

493

## 494 **Competing Interests**

495 T.P.S.C., B.M.A. and M.A.P. are listed as inventors on a patent pertaining to inhibitors  
496 described in the manuscript. Patent Title: Heterocyclic inhibitors of lysine biosynthesis via the  
497 diaminopimelate pathway; International patent (PCT) No.: WO2018187845A1; Granted:  
498 18/10/2018.

## 499 Supplementary Information

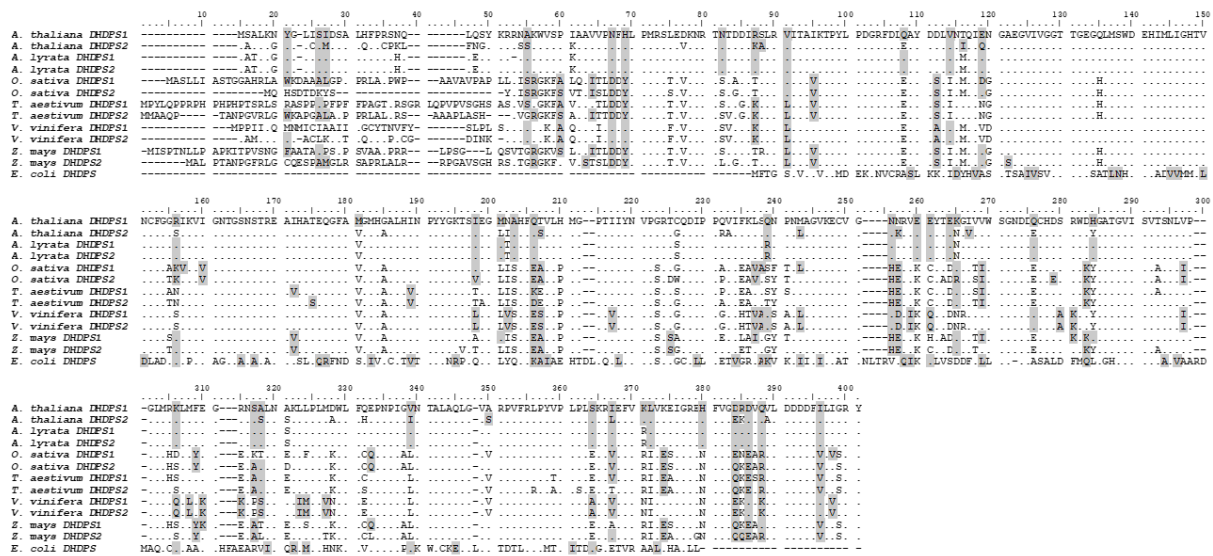

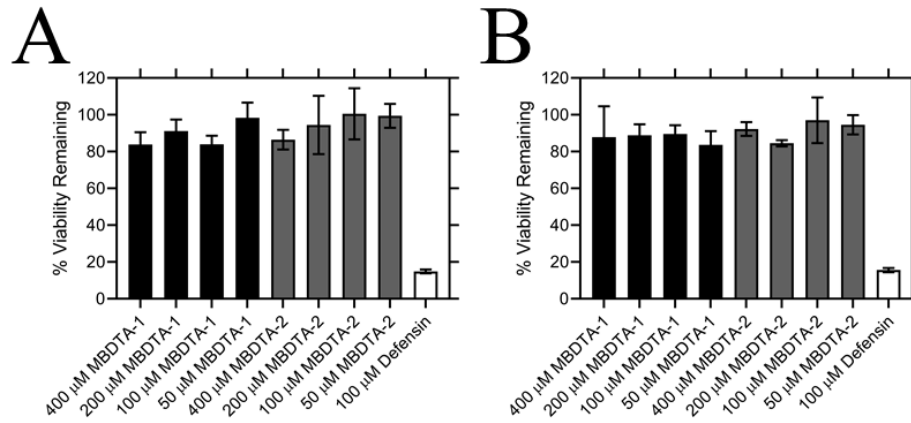

512

513 **Supplementary Figure 2: Effect of compounds on the viability of human cell lines.**

514 Toxicity of MBDTA-1 (black) and MBDTA-2 (grey), compared to the positive control

515 defensin (white), assessed against (A) HepG2 and (B) HEK293 human cell lines using the MTT

516 assay. Data were normalised against a vehicle control (1% (v/v) DMSO) and plotted against

517 inhibitor concentration. Data represents mean  $\pm$  S.E.M. ( $N = 3$ ).

518

519 **Figure S2 – Source Data 1: MBDTA-1/2 mammalian cell toxicity data.**

## 520 **References**

- 521 Aragão D, Aishima J, Cherukuvada H, Clarken R, Clift M, Cowieson NP, Ericsson DJ, Gee  
522 CL, Macedo S, Mudie N, Panjekar S, Price JR, Riboldi-Tunnicliffe A, Rostan R,  
523 Williamson R, Caradoc-Davies TT. 2018. MX2: a high-flux undulator microfocus  
524 beamline serving both the chemical and macromolecular crystallography communities  
525 at the Australian Synchrotron. *J Synchrotron Radiat* **25**:885–891.  
526 doi:10.1107/S1600577518003120
- 527 Atkinson SC, Dogovski C, Downton MT, Czabotar PE, Dobson RCJ, Gerrard JA, Wagner J,  
528 Perugini MA. 2013. Structural, kinetic and computational investigation of *Vitis vinifera*  
529 DHDPS reveals new insight into the mechanism of lysine-mediated allosteric  
530 inhibition. *Plant Mol Biol* **81**:431–446. doi:10.1007/s11103-013-0014-7
- 531 Baxter AA, Poon IK, Hulett MD. 2017. The plant defensin NaD1 induces tumor cell death via  
532 a non-apoptotic, membranolytic process. *Cell Death Discov* **3**:16102.  
533 doi:10.1038/cddiscovery.2016.102
- 534 Boyes DC, Zayed AM, Ascenzi R, McCaskill AJ, Hoffman NE, Davis KR, Görlach J. 2001.  
535 Growth stage–based phenotypic analysis of Arabidopsis: a model for high throughput  
536 functional genomics in plants. *Plant Cell* **13**:1499–1510. doi:10.1105/TPC.010011
- 537 Chen VB, Arendall WB, Headd JJ, Keedy DA, Immormino RM, Kapral GJ, Murray LW,  
538 Richardson JS, Richardson DC. 2010. *MolProbity*: all-atom structure validation for  
539 macromolecular crystallography. *Acta Crystallogr, Sect D: Struct Biol* **66**:12–21.  
540 doi:10.1107/S0907444909042073
- 541 Christensen JB, Soares da Costa TP, Faou P, Pearce FG, Panjekar S, Perugini MA. 2016.  
542 Structure and Function of Cyanobacterial DHDPS and DHDPR. *Sci Rep* **6**.  
543 doi:10.1038/srep37111
- 544 Corral MG, Leroux J, Stubbs KA, Mylne JS. 2017. Herbicidal properties of antimalarial drugs.  
545 *Sci Rep* **7**. doi:10.1038/srep45871
- 546 Craciun A, Jacobs M, Vauterin M. 2000. *Arabidopsis* loss-of-function mutant in the lysine  
547 pathway points out complex regulation mechanisms. *FEBS Lett* **487**:234–238.  
548 doi:10.1016/S0014-5793(00)02303-6
- 549 Duke SO. 2012. Why have no new herbicide modes of action appeared in recent years? *Pest*  
550 *Manage Sci* **68**:505–512. doi:10.1002/ps.2333
- 551 Emsley P, Lohkamp B, Scott WG, Cowtan K. 2010. Features and development of *Coot*. *Acta*  
552 *Crystallogr, Sect D: Struct Biol* **66**:486–501. doi:10.1107/S0907444910007493



- 553 Evans PR, Murshudov GN. 2013. How good are my data and what is the resolution? *Acta*  
554 *Crystallogr, Sect D: Struct Biol* **69**:1204–1214. doi:10.1107/S0907444913000061
- 555 Galili G, Amir R. 2013. Fortifying plants with the essential amino acids lysine and methionine  
556 to improve nutritional quality. *Plant Biotechnol J* **11**:211–222. doi:10.1111/pbi.12025
- 557 Geng F, Chen Z, Zheng P, Sun J, Zeng A-P. 2013. Exploring the allosteric mechanism of  
558 dihydrodipicolinate synthase by reverse engineering of the allosteric inhibitor binding  
559 sites and its application for lysine production. *Appl Microbiol Biotechnol* **97**:1963–  
560 1971. doi:10.1007/s00253-012-4062-8
- 561 Ghislain M, Frankard V, Jacobs M. 1995. A dinucleotide mutation in dihydrodipicolinate  
562 synthase of *Nicotiana sylvestris* leads to lysine overproduction. *Plant J* **8**:733–743.  
563 doi:10.1046/j.1365-313X.1995.08050733.x
- 564 Griffin MDW, Billakanti JM, Wason A, Keller S, Mertens HDT, Atkinson SC, Dobson RCJ,  
565 Perugini MA, Gerrard JA, Pearce FG. 2012. Characterisation of the first enzymes  
566 committed to lysine biosynthesis in *Arabidopsis thaliana*. *PLoS ONE* **7**:e40318.  
567 doi:10.1371/journal.pone.0040318
- 568 Hall C, Soares da Costa T. 2018. Lysine: biosynthesis, catabolism and roles. *WikiJournal of*  
569 *Science* **1**:4. doi:10.15347/wjs/2018.004
- 570 Hall CJ, Lee M, Boarder MP, Mangion AM, Gendall AR, Panjekar S, Perugini MA, Soares da  
571 Costa TP. 2021. Differential lysine-mediated allosteric regulation of plant  
572 dihydrodipicolinate synthase isoforms. *FEBS J* febs.15766. doi:10.1111/febs.15766
- 573 Hall CJ, Mackie ER, Gendall AR, Perugini MA, Soares da Costa TP. 2020. Review: amino  
574 acid biosynthesis as a target for herbicide development. *Pest Manage Sci*.  
575 doi:10.1002/ps.5943
- 576 Hall T. 1999. BioEdit: a user-friendly biological sequence alignment editor and analysis  
577 program for windows 95/98/NT. *Nucleic Acids Symp Ser* **41**:95–98.
- 578 Heap I. 2021. The international survey of herbicide resistant weeds.  
579 <http://www.weedscience.com>
- 580 Heap I. 2014. Global perspective of herbicide-resistant weeds. *Pest Manage Sci* **70**:1306–1315.  
581 doi:10.1002/ps.3696
- 582 Hildebrandt TM, Nunes Nesi A, Araújo WL, Braun H-P. 2015. Amino acid catabolism in  
583 plants. *Mol Plant* **8**:1563–1579. doi:10.1016/j.molp.2015.09.005
- 584 Hudson AO, Bless C, Macedo P, Chatterjee SP, Singh BK, Gilvarg C, Leustek T. 2005.  
585 Biosynthesis of lysine in plants: evidence for a variant of the known bacterial pathways.  
586 *Biochim Biophys Acta, Gen Subj* **1721**:27–36. doi:10.1016/j.bbagen.2004.09.008

- 587 Hutton CA, Perugini MA, Gerrard JA. 2007. Inhibition of lysine biosynthesis: an evolving  
588 antibiotic strategy. *Mol BioSyst* **3**:458. doi:10.1039/b705624a
- 589 Jones-Held S, Ambrozevicius LP, Campbell M, Drumheller B, Harrington E, Leustek T. 2012.  
590 Two *Arabidopsis thaliana* dihydrodipicolinate synthases, DHDPS1 and DHDPS2, are  
591 unequally redundant. *Funct Plant Biol* **39**:1058–1067. doi:10.1071/FP12169
- 592 Kabsch W. 2010. XDS. *Acta Crystallogr, Sect D: Struct Biol* **66**:125–132.  
593 doi:10.1107/S0907444909047337
- 594 Lindsey BE, Rivero L, Calhoun CS, Grotewold E, Brkljacic J. 2017. Standardized method for  
595 high-throughput sterilization of *Arabidopsis* seeds. *JoVE* 56587. doi:10.3791/56587
- 596 Long F, Nicholls RA, Emsley P, Gražulis S, Merkys A, Vaitkus A, Murshudov GN. 2017.  
597 *AceDRG*: a stereochemical description generator for ligands. *Acta Crystallogr, Sect D:*  
598 *Struct Biol* **73**:112–122. doi:10.1107/S2059798317000067
- 599 McCoy AJ, Adams NE, Hudson AO, Gilvarg C, Leustek T, Maurelli AT. 2006. L,L-  
600 diaminopimelate aminotransferase, a trans-kingdom enzyme shared by *Chlamydia* and  
601 plants for synthesis of diaminopimelate/lysine. *Proc Natl Acad Sci USA* **103**:17909–  
602 17914. doi:10.1073/pnas.0608643103
- 603 Murshudov GN, Skubák P, Lebedev AA, Pannu NS, Steiner RA, Nicholls RA, Winn MD,  
604 Long F, Vagin AA. 2011. *REFMAC 5* for the refinement of macromolecular crystal  
605 structures. *Acta Crystallogr, Sect D: Struct Biol* **67**:355–367.  
606 doi:10.1107/S0907444911001314
- 607 National Committee for Clinical Laboratory Standards. 2004. Standard for Antimicrobial  
608 Susceptibility Testing, 13th Information Supplement. Wayne, Pa: NCCLS.
- 609 National Committee for Clinical Laboratory Standards. 2003. Methods for Dilution  
610 Antimicrobial Susceptibility Tests for Bacteria that Grow Aerobically, Approved  
611 Standard, 6th ed. Wayne, Pa: NCCLS.
- 612 Panjikar S, Parthasarathy V, Lamzin VS, Weiss MS, Tucker PA. 2005. *Auto-Rickshaw* : an  
613 automated crystal structure determination platform as an efficient tool for the validation  
614 of an X-ray diffraction experiment. *Acta Crystallogr, Sect D: Struct Biol* **61**:449–457.  
615 doi:10.1107/S0907444905001307
- 616 Perl A, Galili S, Shaul O, Ben-Tzvi I, Galili G. 1993. Bacterial dihydrodipicolinate synthase  
617 and desensitized aspartate kinase: two novel selectable markers for plant  
618 transformation. *Nat Biotechnol* **11**:715–718. doi:10.1038/nbt0693-715
- 619 Perugini MA, Abbott B, Soares da Costa T. 2018. Heterocyclic inhibitors of lysine biosynthesis  
620 via the diaminopimelate pathway. WO2018187845A1.

- 621 Peverelli MG, Perugini MA. 2015. An optimized coupled assay for quantifying  
622 diaminopimelate decarboxylase activity. *Biochimie* **115**:78–85.  
623 doi:10.1016/j.biochi.2015.05.004
- 624 Rasband WS. 2011. ImageJ, U.S. National Institutes of Health, Bethesda, Maryland, USA.  
625 <http://imagej.nih.gov/ij/>.
- 626 Sarrobert C, Thibaud M-C, Contard-David P, Gineste S, Bechtold N, Robaglia C, Nussaume  
627 L. 2000. Identification of an *Arabidopsis thaliana* mutant accumulating threonine  
628 resulting from mutation in a new dihydrodipicolinate synthase gene. *Plant J* **24**:357–  
629 368. doi:10.1046/j.1365-313x.2000.00884.x
- 630 Soares da Costa TP, Abbott BM, Gendall AR, Panjekar S, Perugini MA. 2017. Molecular  
631 evolution of an oligomeric biocatalyst functioning in lysine biosynthesis. *Biophys Rev*  
632 **10**:153–162. doi:10.1007/s12551-017-0350-y
- 633 Soares da Costa TP, Christensen JB, Desbois S, Gordon SE, Gupta R, Hogan CJ, Nelson TG,  
634 Downton MT, Gardhi CK, Abbott BM, Wagner J, Panjekar S, Perugini MA. 2015.  
635 Quaternary structure analyses of an essential oligomeric enzyme *Methods in*  
636 *Enzymology*. Elsevier. pp. 205–223. doi:10.1016/bs.mie.2015.06.020
- 637 Soares da Costa TP, Tieu W, Yap MY, Pardini NR, Polyak SW, Sejer Pedersen D, Morona R,  
638 Turnidge JD, Wallace JC, Wilce MCJ, Booker GW, Abell AD. 2012. Selective  
639 inhibition of biotin protein ligase from *Staphylococcus aureus*. *J Biol Chem*  
640 **287**:17823–17832. doi:10.1074/jbc.M112.356576
- 641 Soares da Costa TP, Desbois S, Dogovski C, Gorman MA, Ketaren NE, Paxman JJ, Siddiqui  
642 T, Zammit LM, Abbott BM, Robins-Browne RM, Parker MW, Jameson GB, Hall NE,  
643 Panjekar S, Perugini MA. 2016. Structural determinants defining the allosteric  
644 inhibition of an essential antibiotic target. *Structure* **24**:1282–1291.  
645 doi:10.1016/j.str.2016.05.019
- 646 Thompson JD, Higgins DG, Gibson TJ. 1994. CLUSTAL W: improving the sensitivity of  
647 progressive multiple sequence alignment through sequence weighting, position-  
648 specific gap penalties and weight matrix choice. *Nucl Acids Res* **22**:4673–4680.  
649 doi:10.1093/nar/22.22.4673
- 650 Tomé D, Bos C. 2007. Lysine requirement through the human life cycle. *J Nutr* **137**:1642S-  
651 1645S.
- 652 Tukey JW. 1977. Exploratory data analysis, Addison-Wesley series in behavioral science.  
653 Reading, Mass: Addison-Wesley Pub. Co.

- 654 Vats S. 2015. Herbicides: History, Classification and Genetic Manipulation of Plants for  
655 Herbicide Resistance In: Lichtfouse E, editor. Sustainable Agriculture Reviews. Cham:  
656 Springer International Publishing. pp. 153–192. doi:10.1007/978-3-319-09132-7\_3
- 657 Vauterin M, Jacobs M. 1994. Isolation of a poplar and an *Arabidopsis thaliana*  
658 dihydrodipicolinate synthase cDNA clone. *Plant Mol Biol* **25**:545–550.  
659 doi:10.1007/BF00043882
- 660 Wang G, Xu M, Wang W, Galili G. 2017. Fortifying horticultural crops with essential amino  
661 acids: a review. *Int J Mol Sci* **18**:1306. doi:10.3390/ijms18061306
- 662 Winn MD, Ballard CC, Cowtan KD, Dodson EJ, Emsley P, Evans PR, Keegan RM, Krissinel  
663 EB, Leslie AGW, McCoy A, McNicholas SJ, Murshudov GN, Pannu NS, Potterton EA,  
664 Powell HR, Read RJ, Vagin A, Wilson KS. 2011. Overview of the CCP4 suite and  
665 current developments. *Acta Crystallogr, Sect D: Struct Biol* **67**:235–242.  
666 doi:10.1107/S0907444910045749
- 667 Yugari Y, Gilvarg C. 1965. The condensation step in diaminopimelate synthesis. *J Biol Chem*  
668 **240**:4710–4716.  
669

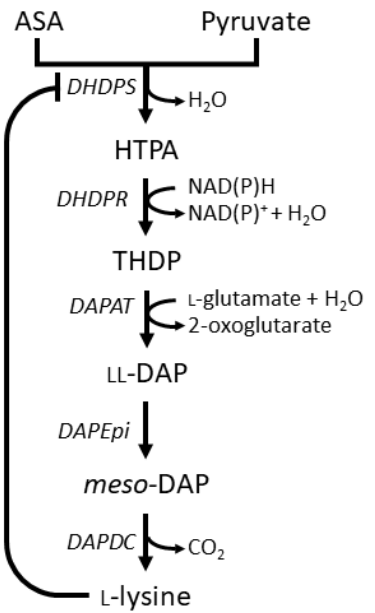

**A**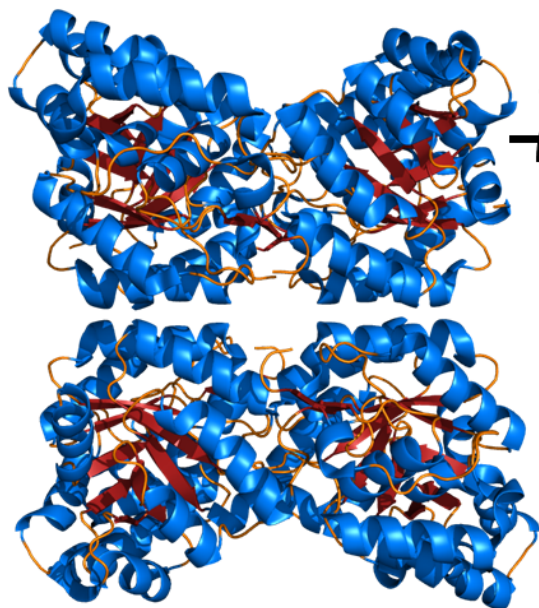**B**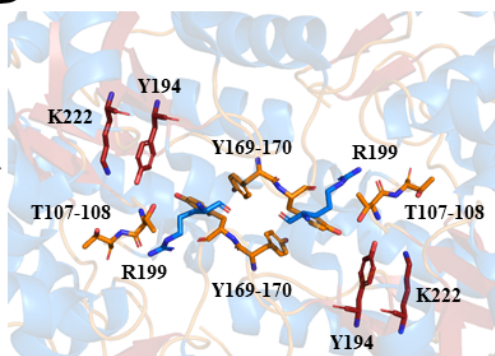**C**

At1  
At2  
Al1  
Os1  
Ta1  
Vv1  
Zm1  
Ec

|     | 107   | 169   | 194  | 199  | 222 |
|-----|-------|-------|------|------|-----|
| At1 | TT... | YY... | Y... | R... | K   |
| At2 | TT... | YY... | Y... | R... | K   |
| Al1 | TT... | YY... | Y... | R... | K   |
| Os1 | TT... | YY... | Y... | R... | K   |
| Ta1 | TT... | YY... | Y... | R... | K   |
| Vv1 | TT... | YY... | Y... | R... | K   |
| Zm1 | TT... | YY... | Y... | R... | K   |
| Ec  | TT... | YY... | Y... | R... | K   |

**D**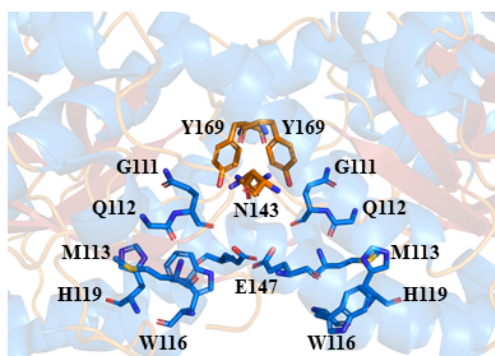**E**

At1  
At2  
Al1  
Os1  
Ta1  
Vv1  
Zm1  
Ec

|     | 111      | 119  | 143  | 147  | 169 |
|-----|----------|------|------|------|-----|
| At1 | GQ.M.W.. | H... | N... | E... | Y   |
| At2 | GQ.M.W.. | H... | N... | E... | Y   |
| Al1 | GQ.M.W.. | H... | N... | E... | Y   |
| Os1 | GH.M.W.. | H... | N... | E... | Y   |
| Ta1 | GH.M.W.. | H... | N... | E... | Y   |
| Vv1 | GQ.M.W.. | H... | N... | E... | Y   |
| Zm1 | GH.M.W.. | H... | N... | E... | Y   |
| Ec  | SA.L.H.. | H... | N... | E... | Y   |

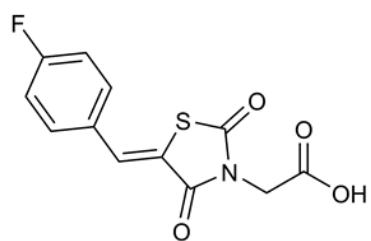

FBDTA

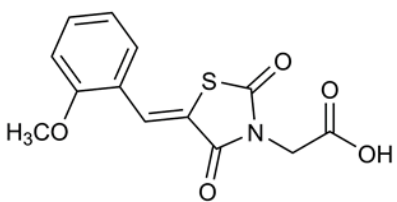

MBDTA-1

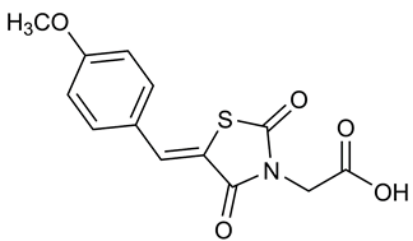

MBDTA-2

**A**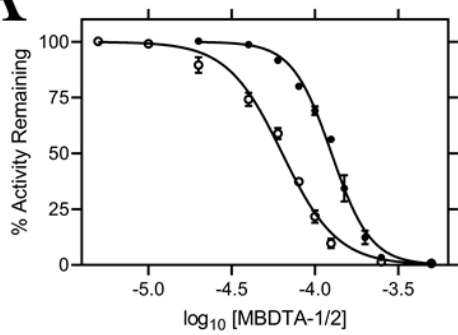**B**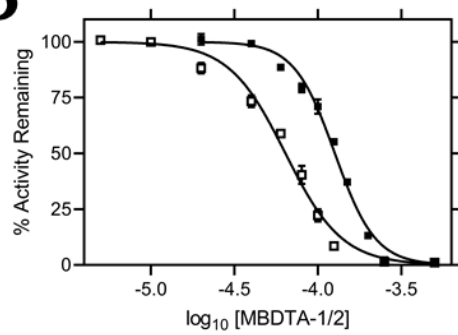



**A**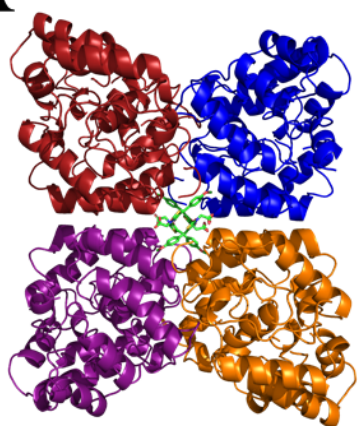**B**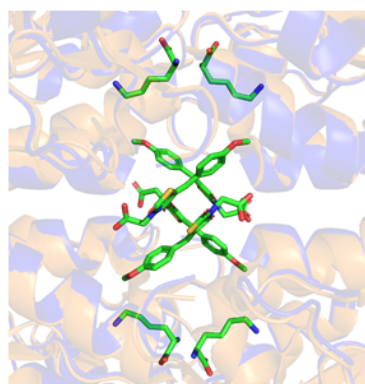**C**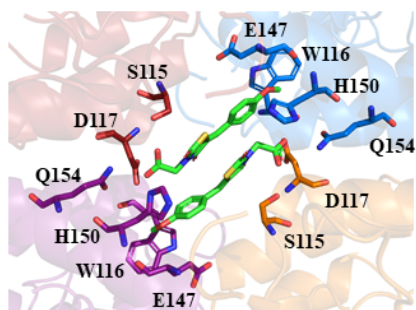**D**

|     | 115             | 147 | 150 | 154 |
|-----|-----------------|-----|-----|-----|
| At1 | SW....E...H...Q |     |     |     |
| At2 | SW....E...H...Q |     |     |     |
| Al1 | SW....E...H...Q |     |     |     |
| Os1 | SW....E...H...Q |     |     |     |
| Ta1 | SW....E...H...Q |     |     |     |
| Vv1 | SW....E...H...Q |     |     |     |
| Zm1 | SW....E...H...Q |     |     |     |
| Ec  | NH....E...S...R |     |     |     |

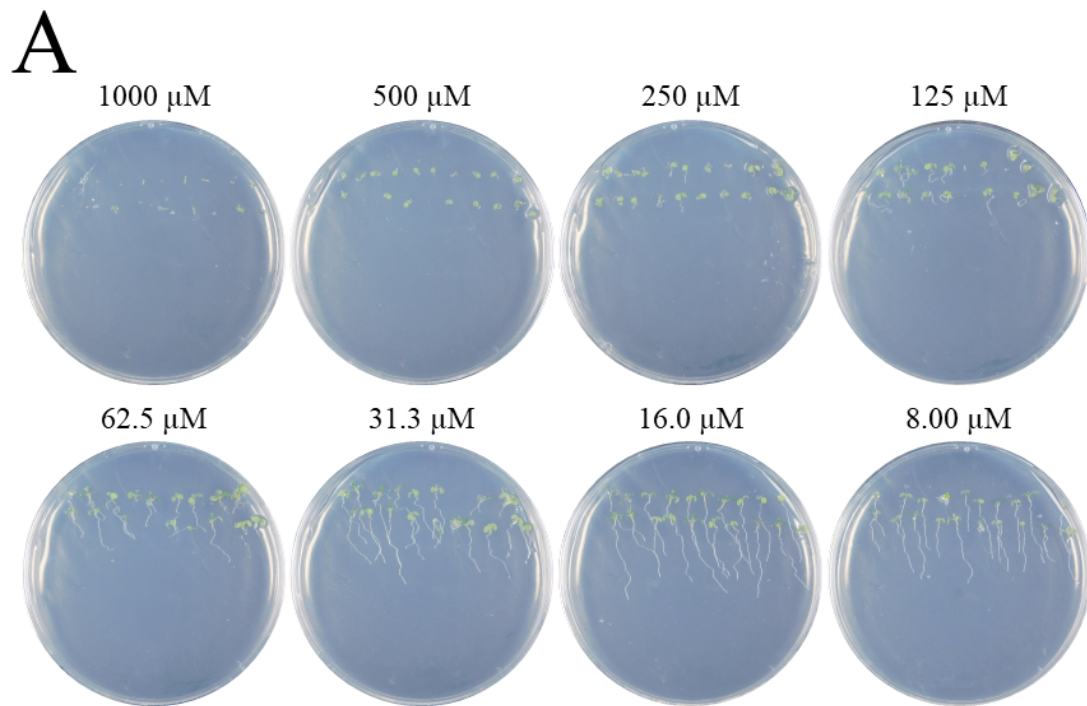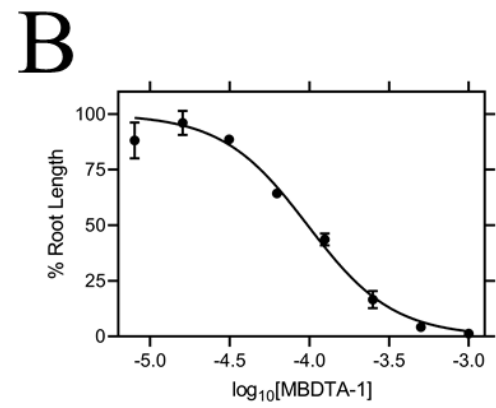

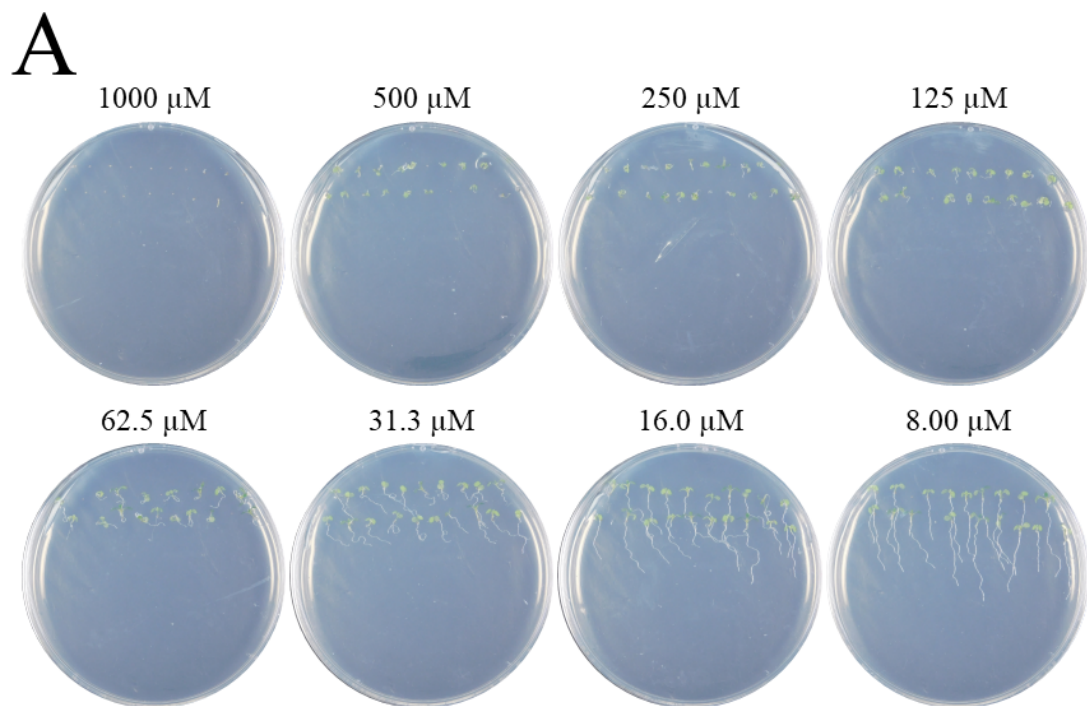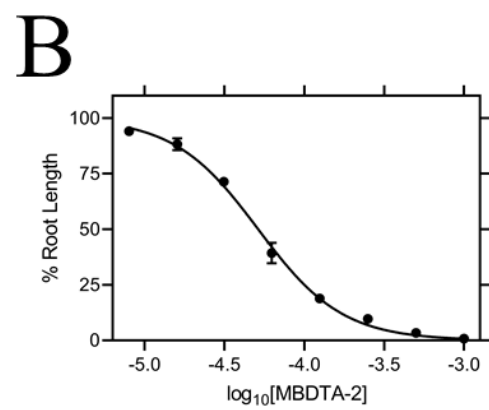

**A**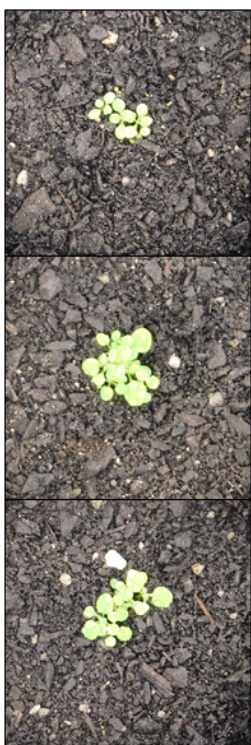**B**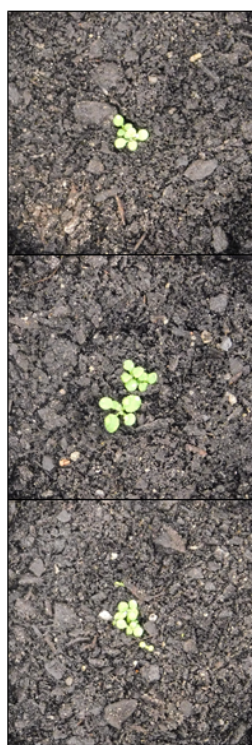**C**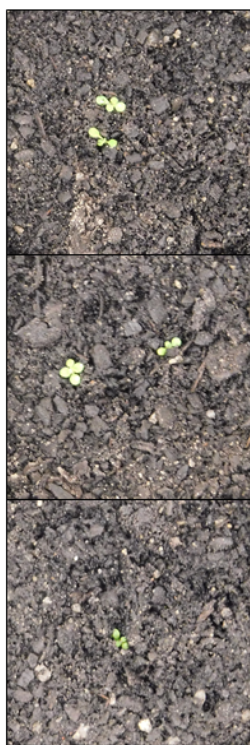**D**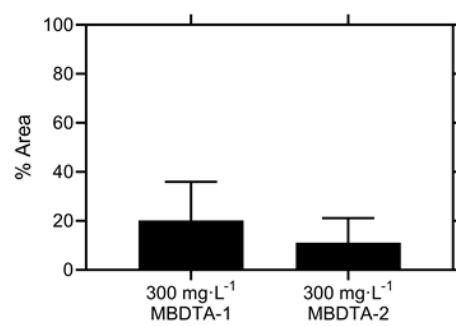

```

10      20      30      40      50      60      70      80      90      100     110     120     130     140     150
A. thaliana DHDFS1  -----MSALKN  YG-LISIDSA  LHFRSNQ-----LQSY  KRRAKRWVSP  IAAVVVNEHL  PMRSLEDKNR  INIDDIRSLR  VITAIKTPYL  PDGRFDIQAY  DDLVNTQIEN  GAEGVIUGGT  TEGEQILMSWD  EHMHLIGHTV
A. thaliana DHDFS2  -----A...G  --C.M...  .Q..CPKL-----FNG...  SS...  K...  V...  KA...  E...  I...  Q...  M...  M...  H...  H...
A. lyrata DHDFS1    -----AT..G  -----H...  E...  E...  K...  K...  V...  V...  V...  F...  S...  I...  M...  DC...  H...
A. lyrata DHDFS2    -----AT..G  -----H...  E...  E...  K...  K...  V...  V...  V...  F...  S...  I...  M...  DC...  H...
O. sativa DHDFS1    ---MASLLI  ASTGGARLA  WDAARALGP  PRLA.PWP---AAVAVPAP  LL.ISRGKFA  LQ.ITLDDY...  T.V...  S.A.T...  V...  F...  S...  I...  M...  DC...  H...
O. sativa DHDFS2    ---MASLLI  ASTGGARLA  WDAARALGP  PRLA.PWP---AAVAVPAP  LL.ISRGKFA  LQ.ITLDDY...  T.V...  S.A.T...  V...  F...  S...  I...  M...  DC...  H...
T. aestivum DHDFS1  MPYLQPPRRH  PHEHPTSRIS  RASPP.PFPF  FPAGT.RSGR  LQPVVVSGHS  AS.VS.GKFA  V...T.LDDY...  T.V...  S.G.K...  L...V...  E...  S...  I...  M...  DC...  H...
T. aestivum DHDFS2  MMAAQP----  -TANPGVRLG  WKAPGALA.P  PRLAL.RS---AAAPLASH--  VGRGKFA.A.ITDDY...  T.V...  S.V.G.K...  L...V...  E...  S...  I...  M...  DC...  H...
V. vinifera DHDFS1  ---MPPII.Q  MMICIAAII  .GCYTNVYF-----SLPL.S...  K.A.Q...  I...  F.V...  S.V...  K...  L...  E...  A...  M...  VD...  H...
V. vinifera DHDFS2  ---MPPII.Q  MMICIAAII  .GCYTNVYF-----SLPL.S...  K.A.Q...  I...  F.V...  S.V...  K...  L...  E...  A...  M...  VD...  H...
Z. mays DHDFS1     ---MISPINLLP  APKITPVSNQ  EAATA.PS.P  SVAA.PRR---LPSG---L  QSVTGRGKVS  L.ITLDDY...  T.V...  S...  TR...  L...  V...  E...  S...  I...  M...  DC...  H...
Z. mays DHDFS2     ---MAL  PTANPGFRLG  CQESFAMGLR  SAPRLALR---RPGAVSHG  RS.TGRKFA  V.STSLDDY...  T.V...  L.G.T...  L...  V...  E...  S...  I...  M...  DC...  H...
E. coli DHDFS      -----MFTG  S.V...  V...  MD  EK.NVCRASL  KK.IDYHVAS  TSAIVSV...  SATLNH...  ALVMMI...  I...
160     170     180     190     200     210     220     230     240     250     260     270     280     290     300
A. thaliana DHDFS1  NCFGGRIKVI  GNTGNSNSTR  EAIHATEQGFA  MEMHGALHIN  FYYGKTSIEG  MNAHFQIVLH  MG--PTIIYN  VPGRICQDIP  PQVIFKLSN  PNMAGVKECV  G---NRRVE  EYTEKGIUVN  SGNDIQCHDS  RWDHGATGVI  SVTSNLVPE--
A. thaliana DHDFS2  .S...  .V...  A...  V...  LIS...  EA...  P...  .S...  G...  RA...  L...  K...  N...  V...  E...  Y...  .A...  I...
A. lyrata DHDFS1    .S...  .V...  .V...  .V...  LIS...  EA...  P...  .S...  S...  P...  EA...  SY...  T...  HE...  K...  C...  D...  SI...  E...  E...  KY...  .A...  I...
A. lyrata DHDFS2    .S...  .V...  .V...  .V...  LIS...  EA...  P...  .S...  S...  P...  EA...  SY...  T...  HE...  K...  C...  D...  SI...  E...  E...  KY...  .A...  I...
O. sativa DHDFS1    .S...  .V...  .V...  .V...  LIS...  EA...  P...  .S...  S...  P...  EA...  SY...  T...  HE...  K...  C...  D...  SI...  E...  E...  KY...  .A...  I...
O. sativa DHDFS2    .S...  .V...  .V...  .V...  LIS...  EA...  P...  .S...  S...  P...  EA...  SY...  T...  HE...  K...  C...  D...  SI...  E...  E...  KY...  .A...  I...
T. aestivum DHDFS1  .S...  .V...  .V...  .V...  LIS...  EA...  P...  .S...  S...  P...  EA...  SY...  T...  HE...  K...  C...  D...  SI...  E...  E...  KY...  .A...  I...
T. aestivum DHDFS2  .S...  .V...  .V...  .V...  LIS...  EA...  P...  .S...  S...  P...  EA...  SY...  T...  HE...  K...  C...  D...  SI...  E...  E...  KY...  .A...  I...
V. vinifera DHDFS1  .S...  .V...  .V...  .V...  LIS...  EA...  P...  .S...  S...  P...  EA...  SY...  T...  HE...  K...  C...  D...  SI...  E...  E...  KY...  .A...  I...
V. vinifera DHDFS2  .S...  .V...  .V...  .V...  LIS...  EA...  P...  .S...  S...  P...  EA...  SY...  T...  HE...  K...  C...  D...  SI...  E...  E...  KY...  .A...  I...
Z. mays DHDFS1     .S...  .V...  .V...  .V...  LIS...  EA...  P...  .S...  S...  P...  EA...  SY...  T...  HE...  K...  C...  D...  SI...  E...  E...  KY...  .A...  I...
Z. mays DHDFS2     .S...  .V...  .V...  .V...  LIS...  EA...  P...  .S...  S...  P...  EA...  SY...  T...  HE...  K...  C...  D...  SI...  E...  E...  KY...  .A...  I...
E. coli DHDFS      DLAD...  P...  AG...  A...  A...  A...  .SL.QRFND  S.IV.C.TVT  .NRP.Q...  LYQ...  KAIAE  HTDL.Q.L...  .S...  GC.LL  .ETVGR  .EKV  K...  I...  I...  AT  .NLTRV  QIK  LVSDDF.LL  .ASALD  FMQL.GH...  .A.VAARD
310     320     330     340     350     360     370     380     390     400
A. thaliana DHDFS1  -GIMRKLIMFE  G---RNSALN  AKLLPLMDWL  FQEPNPIGVN  TALAQLG-VA  RPVFRLPYVP  LPLSKRIEFV  KLVKEIGREH  FVGDREIVUL  DDDDFILIGR  Y
A. thaliana DHDFS2  .S...  .S...  .A...  .H...  .I...  .S...  .L...  .L...  .E...  K...  A...  .
A. lyrata DHDFS1    .S...  .S...  .S...  .S...  .S...  .S...  .S...  .S...  .S...  R...  .
A. lyrata DHDFS2    .S...  .S...  .S...  .S...  .S...  .S...  .S...  .S...  .S...  R...  .
O. sativa DHDFS1    .S...  .S...  .S...  .S...  .S...  .S...  .S...  .S...  .S...  R...  .
O. sativa DHDFS2    .S...  .S...  .S...  .S...  .S...  .S...  .S...  .S...  .S...  R...  .
T. aestivum DHDFS1  .S...  .S...  .S...  .S...  .S...  .S...  .S...  .S...  .S...  R...  .
T. aestivum DHDFS2  .S...  .S...  .S...  .S...  .S...  .S...  .S...  .S...  .S...  R...  .
V. vinifera DHDFS1  .S...  .S...  .S...  .S...  .S...  .S...  .S...  .S...  .S...  R...  .
V. vinifera DHDFS2  .S...  .S...  .S...  .S...  .S...  .S...  .S...  .S...  .S...  R...  .
Z. mays DHDFS1     .S...  .S...  .S...  .S...  .S...  .S...  .S...  .S...  .S...  R...  .
Z. mays DHDFS2     .S...  .S...  .S...  .S...  .S...  .S...  .S...  .S...  .S...  R...  .
E. coli DHDFS      MAQ...  C...  AA...  .HFAEARVI  QR.M...  HNK...  .V...  .P...  K...  W.CKE...  .L...  TDTL...  MT...  ITD...  G.ETVR  AAL.HA.LL-

```

**A**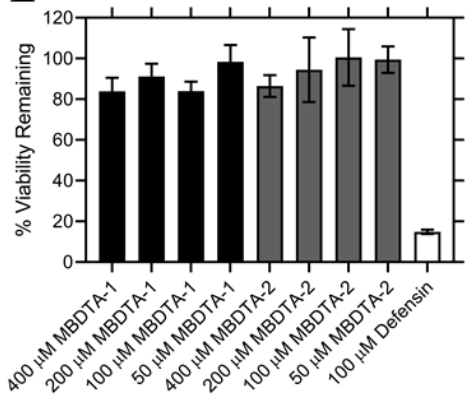**B**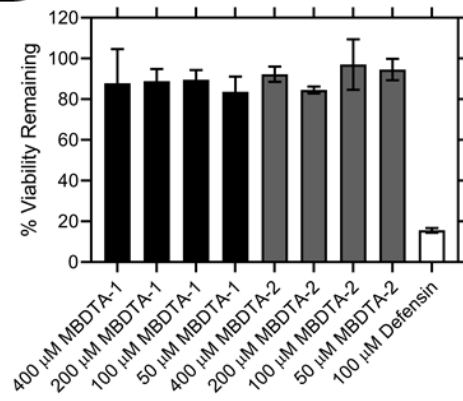

Source: http://biorxiv.org/content/10.1101/2021.05.06.442928v1.full.pdf
